# Supplementary material for: COSMIN methodology for evaluating the content validity of patient-reported outcome measures: a Delphi study
Source: Qual Life Res. 2018 Mar 17;27(5):1159–70. doi: 10.1007/s11136-018-1829-0 (PMC5891557; doi:10.1007/s11136-018-1829-0)
Supplement: Supplementary file 2 — Supplementary material 2 (PDF 442 KB) [file 11136_2018_1829_MOESM2_ESM.pdf]

## COSMIN box 2. Standards for evaluating the quality of content validity studies of PROMs

Only those parts of the box need to be completed for which information is available. For example, if a content validity study was not performed in professionals, parts 2d and 2e do not need to be completed. If patients were included in a content validity study, but they were only asked about comprehensibility of the PROM items, sections 2a and 2b do not need to be completed.

For rating the standards, the “worst score counts” method is used. A total score for the box can be obtained by taking the lowest rating of any standard in the box. It is also possible to obtain total ratings for different parts of the boxes by taking the lowest rating of any standard of that part of the box.

| Box 2. Content validity             |                                                                                                                              |                                                 |                                                                                                                  |                                                                                                                      |                                                                                    |
|-------------------------------------|------------------------------------------------------------------------------------------------------------------------------|-------------------------------------------------|------------------------------------------------------------------------------------------------------------------|----------------------------------------------------------------------------------------------------------------------|------------------------------------------------------------------------------------|
| 2a. Asking patients about relevance |                                                                                                                              |                                                 |                                                                                                                  |                                                                                                                      |                                                                                    |
| Design requirements                 |                                                                                                                              | Very good                                       | Adequate                                                                                                         | Doubtful                                                                                                             | Inadequate                                                                         |
| 1                                   | Was an appropriate method used to ask patients whether each item is <u>relevant</u> for their experience with the condition? | Widely recognized or well justified method used | Only quantitative (survey) method(s) used or assumable that the method was appropriate but not clearly described | Not clear if patients were asked whether <u>each</u> item is relevant or doubtful whether the method was appropriate | Method used not appropriate or patients not asked about the relevance of all items |
| 2                                   | Was each item tested in an appropriate number of patients?<br>For qualitative studies<br>For quantitative (survey) studies   | ≥7<br>≥50                                       | 4-6<br>≥30                                                                                                       | <4 or not clear<br><30 or not clear                                                                                  |                                                                                    |

|   |                                                                                         |                                                                         |                                                                                                                   |                                                                                                                                                                                           |                           |                |
|---|-----------------------------------------------------------------------------------------|-------------------------------------------------------------------------|-------------------------------------------------------------------------------------------------------------------|-------------------------------------------------------------------------------------------------------------------------------------------------------------------------------------------|---------------------------|----------------|
| 3 | Were skilled group moderators/interviewers used?                                        | Skilled group moderators/<br>interviewers used                          | Group moderators /interviewers had limited experience or were trained specifically for the study                  | Not clear if group moderators /interviewers were trained or group moderators /interviewers not trained and no experience                                                                  |                           | Not applicable |
| 4 | Were the group meetings or interviews based on an appropriate topic or interview guide? | Appropriate topic or interview guide                                    | Assumable that the topic or interview guide was appropriate, but not clearly described                            | Not clear if a topic guide was used or doubtful if topic or interview guide was appropriate or no guide                                                                                   |                           | Not applicable |
| 5 | Were the group meetings or interviews recorded and transcribed verbatim?                | All group meetings or interviews were recorded and transcribed verbatim | Assumable that all group meetings or interviews were recorded and transcribed verbatim, but not clearly described | Not clear if all group meetings or interviews were recorded and transcribed verbatim or recordings not transcribed verbatim or only notes were made during the group meetings/ interviews | No recording and no notes | Not applicable |

| <i>Analyses</i> |                                                         |                                                         |                                                                                                  |                                                                                                            |                          |
|-----------------|---------------------------------------------------------|---------------------------------------------------------|--------------------------------------------------------------------------------------------------|------------------------------------------------------------------------------------------------------------|--------------------------|
| 6               | Was an appropriate approach used to analyse the data?   | A widely recognized or well justified approach was used | Assumable that the approach was appropriate, but not clearly described                           | Not clear what approach was used or doubtful whether the approach was appropriate                          | Approach not appropriate |
| 7               | Were at least two researchers involved in the analysis? | At least two researchers involved in the analysis       | Assumable that at least two researchers were involved in the analysis, but not clearly described | Not clear if two researchers were included in the analysis or only one researcher involved in the analysis |                          |

| 2b. Asking patients about comprehensiveness |                                                                                                                            |                                                 |                                                                                                                  |                                                                                                                          |                             |                |
|---------------------------------------------|----------------------------------------------------------------------------------------------------------------------------|-------------------------------------------------|------------------------------------------------------------------------------------------------------------------|--------------------------------------------------------------------------------------------------------------------------|-----------------------------|----------------|
| Design requirements                         |                                                                                                                            | Very good                                       | Adequate                                                                                                         | Doubtful                                                                                                                 | Inadequate                  | Not applicable |
| 8                                           | Was an appropriate method used for assessing the <u>comprehensiveness</u> of the PROM?                                     | Widely recognized or well justified method used | Only quantitative (survey) method(s) used or assumable that the method was appropriate but not clearly described | Doubtful whether the method was appropriate                                                                              | Method used not appropriate |                |
| 9                                           | Was each item tested in an appropriate number of patients?<br>For qualitative studies<br>For quantitative (survey) studies | ≥7<br>≥50                                       | 4-6<br>30-49                                                                                                     | <4 or not clear<br><30 or not clear                                                                                      |                             |                |
| 10                                          | Were skilled group moderators/interviewers used?                                                                           | Skilled group moderators/ interviewers used     | Group moderators /interviewers had limited experience or were trained specifically for the study                 | Not clear if group moderators /interviewers were trained or group moderators /interviewers not trained and no experience |                             | Not applicable |
| 11                                          | Were the group meetings or interviews based on an appropriate topic or interview guide?                                    | Appropriate topic or interview guide            | Assumable that the topic or interview guide was appropriate, but not clearly described                           | Not clear if a topic guide was used or doubtful if topic or interview guide was appropriate or no guide                  |                             | Not applicable |

|                 |                                                                          |                                                                         |                                                                                                                   |                                                                                                                                                                                           |                           |                |
|-----------------|--------------------------------------------------------------------------|-------------------------------------------------------------------------|-------------------------------------------------------------------------------------------------------------------|-------------------------------------------------------------------------------------------------------------------------------------------------------------------------------------------|---------------------------|----------------|
| 12              | Were the group meetings or interviews recorded and transcribed verbatim? | All group meetings or interviews were recorded and transcribed verbatim | Assumable that all group meetings or interviews were recorded and transcribed verbatim, but not clearly described | Not clear if all group meetings or interviews were recorded and transcribed verbatim or recordings not transcribed verbatim or only notes were made during the group meetings/ interviews | No recording and no notes | Not applicable |
| <i>Analyses</i> |                                                                          |                                                                         |                                                                                                                   |                                                                                                                                                                                           |                           |                |
| 13              | Was an appropriate approach used to analyse the data?                    | A widely recognized or well justified approach was used                 | Assumable that the approach was appropriate, but not clearly described                                            | Not clear what approach was used or doubtful whether the approach was appropriate                                                                                                         | Approach not appropriate  |                |
| 14              | Were at least two researchers involved in the analysis?                  | At least two researchers involved in the analysis                       | Assumable that at least two researchers were involved in the analysis, but not clearly described                  | Not clear if two researchers were included in the analysis or only one researcher involved in the analysis                                                                                |                           |                |

| 2c. Asking patients about comprehensibility |                                                                                                                                                             |                                                             |                                                                                                 |                                                                                                                                                                                                                                                                                     |                                                                                                                                |                |
|---------------------------------------------|-------------------------------------------------------------------------------------------------------------------------------------------------------------|-------------------------------------------------------------|-------------------------------------------------------------------------------------------------|-------------------------------------------------------------------------------------------------------------------------------------------------------------------------------------------------------------------------------------------------------------------------------------|--------------------------------------------------------------------------------------------------------------------------------|----------------|
| Design requirements                         |                                                                                                                                                             | Very good                                                   | Adequate                                                                                        | Doubtful                                                                                                                                                                                                                                                                            | Inadequate                                                                                                                     | Not applicable |
| 15                                          | Was an appropriate qualitative method used for assessing the <u>comprehensibility</u> of the PROM instructions, items, response options, and recall period? | Widely recognized or well justified qualitative method used | Assumable that the method was appropriate but not clearly described                             | Only quantitative (survey) method(s) used or doubtful whether the method was appropriate or not clear if patients were asked about the comprehensibility of the items, response options or recall period or patients not asked about the comprehensibility of the PROM instructions | Method used not appropriate or patients not asked about the comprehensibility of the items, response options, or recall period |                |
| 16                                          | Was each item tested in an appropriate number of patients?<br>For qualitative studies<br>For quantitative (survey) studies                                  | ≥7<br>≥50                                                   | 4-6<br>≥30                                                                                      | <4 or not clear<br><30 or not clear                                                                                                                                                                                                                                                 |                                                                                                                                |                |
| 17                                          | Were skilled group moderators/interviewers used?                                                                                                            | Skilled group moderators/interviewers used                  | Group moderators/interviewers had limited experience or were trained specifically for the study | Not clear if group moderators/interviewers were trained or group moderators/interviewers not trained and no experience                                                                                                                                                              |                                                                                                                                |                |

|                 |                                                                                         |                                                                         |                                                                                                                   |                                                                                                                                                                                           |                           |                |
|-----------------|-----------------------------------------------------------------------------------------|-------------------------------------------------------------------------|-------------------------------------------------------------------------------------------------------------------|-------------------------------------------------------------------------------------------------------------------------------------------------------------------------------------------|---------------------------|----------------|
| 18              | Were the group meetings or interviews based on an appropriate topic or interview guide? | Appropriate topic or interview guide                                    | Assumable that the topic or interview guide was appropriate, but not clearly described                            | Not clear if a topic guide was used or doubtful if topic or interview guide was appropriate or no guide                                                                                   |                           | Not applicable |
| 19              | Were the group meetings or interviews recorded and transcribed verbatim?                | All group meetings or interviews were recorded and transcribed verbatim | Assumable that all group meetings or interviews were recorded and transcribed verbatim, but not clearly described | Not clear if all group meetings or interviews were recorded and transcribed verbatim or recordings not transcribed verbatim or only notes were made during the group meetings/ interviews | No recording and no notes | Not applicable |
| <i>Analyses</i> |                                                                                         |                                                                         |                                                                                                                   |                                                                                                                                                                                           |                           |                |
| 20              | Was an appropriate approach used to analyse the data?                                   | A widely recognized or well justified approach was used                 | Assumable that the approach was appropriate, but not clearly described                                            | Not clear what approach was used or doubtful whether the approach was appropriate                                                                                                         | Approach not appropriate  |                |
| 21              | Were at least two researchers involved in the analysis?                                 | At least two researchers involved in the analysis                       | Assumable that at least two researchers were involved in the analysis, but not clearly described                  | Not clear if two researchers were included in the analysis or only one researcher involved in the analysis                                                                                |                           |                |

| 2d. Asking professionals about relevance |                                                                                                                                 |                                                           |                                                                                                                  |                                                                                                                           |                                                                                         |
|------------------------------------------|---------------------------------------------------------------------------------------------------------------------------------|-----------------------------------------------------------|------------------------------------------------------------------------------------------------------------------|---------------------------------------------------------------------------------------------------------------------------|-----------------------------------------------------------------------------------------|
| Design requirements                      |                                                                                                                                 | Very good                                                 | Adequate                                                                                                         | Doubtful                                                                                                                  | Inadequate                                                                              |
| 22                                       | Was an appropriate method used to ask professionals whether each item is <u>relevant</u> for the construct of interest?         | Widely recognized or well justified method used           | Only quantitative (survey) method(s) used or assumable that the method was appropriate but not clearly described | Not clear if professionals were asked whether <u>each</u> item is relevant or doubtful whether the method was appropriate | Method used not appropriate or professionals not asked about the relevance of all items |
| 23                                       | Were professionals from all relevant disciplines included?                                                                      | Professionals from all required disciplines were included | Assumable that professionals from all required disciplines were included, but not clearly described              | Doubtful whether professionals from all required disciplines were included or relevant professionals were not included    |                                                                                         |
| 24                                       | Was each item tested in an appropriate number of professionals?<br>For qualitative studies<br>For quantitative (survey) studies | ≥7<br>≥50                                                 | 4-6<br>≥30                                                                                                       | <4 or not clear<br><30 or not clear                                                                                       |                                                                                         |
| Analyses                                 |                                                                                                                                 |                                                           |                                                                                                                  |                                                                                                                           |                                                                                         |
| 25                                       | Was an appropriate approach used to analyse the data?                                                                           | A widely recognized or well justified approach was used   | Assumable that the approach was appropriate, but not clearly described                                           | Not clear what approach was used or doubtful whether the approach was appropriate                                         | Approach not appropriate                                                                |

|    |                                                         |                                                   |                                                                                                  |                                                                                                            |  |
|----|---------------------------------------------------------|---------------------------------------------------|--------------------------------------------------------------------------------------------------|------------------------------------------------------------------------------------------------------------|--|
| 26 | Were at least two researchers involved in the analysis? | At least two researchers involved in the analysis | Assumable that at least two researchers were involved in the analysis, but not clearly described | Not clear if two researchers were included in the analysis or only one researcher involved in the analysis |  |
|----|---------------------------------------------------------|---------------------------------------------------|--------------------------------------------------------------------------------------------------|------------------------------------------------------------------------------------------------------------|--|

| 2e. Asking professionals about comprehensiveness |                                                                                                                                 |                                                           |                                                                                                                  |                                                                                                                        |                             |                |
|--------------------------------------------------|---------------------------------------------------------------------------------------------------------------------------------|-----------------------------------------------------------|------------------------------------------------------------------------------------------------------------------|------------------------------------------------------------------------------------------------------------------------|-----------------------------|----------------|
| Design requirements                              |                                                                                                                                 | Very good                                                 | Adequate                                                                                                         | Doubtful                                                                                                               | Inadequate                  | Not applicable |
| 27                                               | Was an appropriate method used for assessing the <u>comprehensiveness</u> of the PROM?                                          | Widely recognized or well justified method used           | Only quantitative (survey) method(s) used or assumable that the method was appropriate but not clearly described | Doubtful whether the method was appropriate                                                                            | Method used not appropriate |                |
| 28                                               | Were professionals from all relevant disciplines included?                                                                      | Professionals from all required disciplines were included | Assumable that professionals from all required disciplines were included, but not clearly described              | Doubtful whether professionals from all required disciplines were included or relevant professionals were not included |                             |                |
| 29                                               | Was each item tested in an appropriate number of professionals?<br>For qualitative studies<br>For quantitative (survey) studies | ≥7<br>≥50                                                 | 4-6<br>≥30                                                                                                       | <4 or not clear<br><30 or not clear                                                                                    |                             |                |

|                 |                                                         |                                                         |                                                                                                  |                                                                                                            |                          |
|-----------------|---------------------------------------------------------|---------------------------------------------------------|--------------------------------------------------------------------------------------------------|------------------------------------------------------------------------------------------------------------|--------------------------|
| <i>Analyses</i> |                                                         |                                                         |                                                                                                  |                                                                                                            |                          |
| 30              | Was an appropriate approach used to analyse the data?   | A widely recognized or well justified approach was used | Assumable that the approach was appropriate, but not clearly described                           | Not clear what approach was used or doubtful whether the approach was appropriate                          | Approach not appropriate |
| 31              | Were at least two researchers involved in the analysis? | At least two researchers involved in the analysis       | Assumable that at least two researchers were involved in the analysis, but not clearly described | Not clear if two researchers were included in the analysis or only one researcher involved in the analysis |                          |
